# Supplementary material
Source: MDPI journal article supplement (https://www.mdpi.com/search?q=catalysts-10-00816)
Supplement: s001 [file catalysts-10-00816-s001.pdf]

# Supplementary Materials: Enhanced Direct Dimethyl Ether Synthesis from CO<sub>2</sub>-Rich Syngas with Cu/ZnO/ZrO<sub>2</sub> Catalysts Prepared by Continuous Co-Precipitation

Sabrina Polierer, David Guse, Stefan Wild, Karla Herrera Delgado, Thomas N. Otto, Thomas A. Zevaco, Matthias Kind, Jörg Sauer, Felix Studt and Stephan Pitter

1. N<sub>2</sub> Physisorption Isotherms.
2. XRD of the Spent Catalysts.
3. Catalytic Activity in the Direct DME Synthesis.

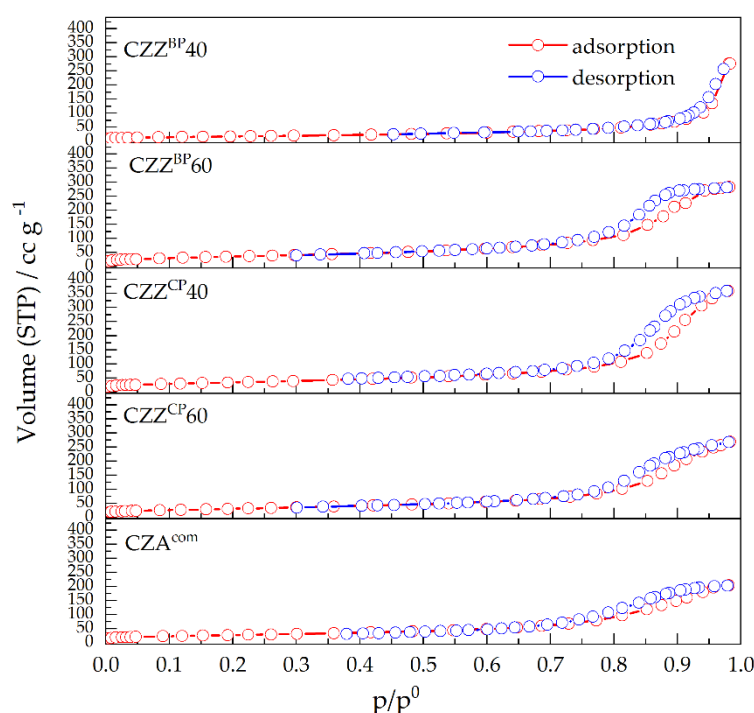

Figure 1. N<sub>2</sub> physisorption isotherms of the calcined CZZ pre-catalysts and CZA<sup>com</sup>.

The sorption isotherms (except CZZ<sup>BP40</sup>) match with type IVa according to IUPAC classification, which is typically associated to partial porous structures. The shape of the hysteresis loop for these pre-catalysts is of the H1 type, typically present in materials with a narrow range of uniform mesopores [1]. The comparative sample from the semi-batch co-precipitation CZZ<sup>BP40</sup> however, shows a reversible type II isotherm, typically indicating nonporous or microporous structure [1].

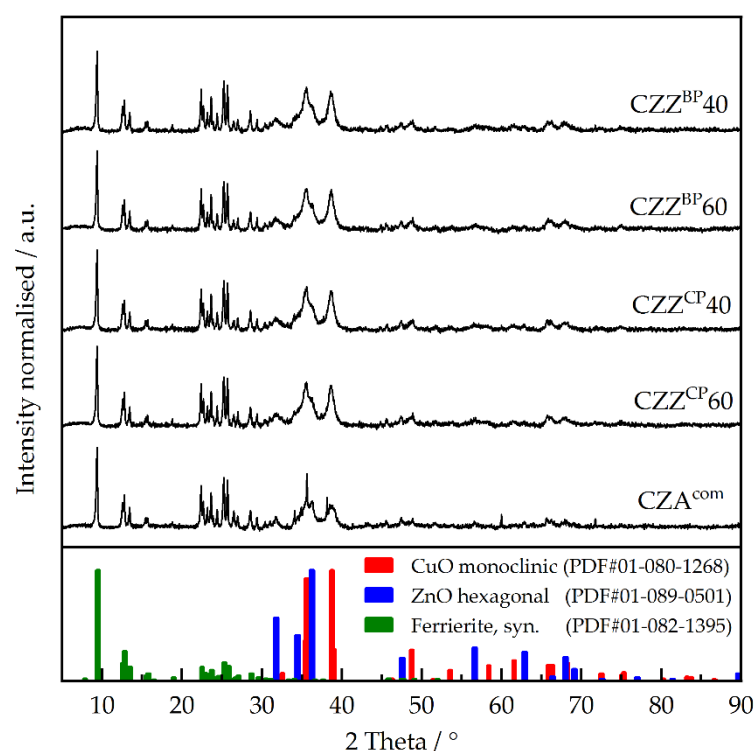

**Figure 2.** X-ray diffraction patterns of the spent CZZ and CZA<sup>com</sup> catalysts. It should be noted that the XRD measurements were carried out after several weeks of storage, what effect the re-oxidation process.

### Catalytic Activity in the Direct DME Synthesis

CO (99.97%), Ar, (99.9999%), N<sub>2</sub> (99.9999%), H<sub>2</sub> (9.9999%) and CO<sub>2</sub>/N<sub>2</sub>, (50:50±1.0 vol.%) (Air Liquid Germany GmbH) were used as reactant gases. The feed compositions for “CO-rich” (CO<sub>2</sub>/(CO+CO<sub>2</sub>)=0.2) and “CO<sub>2</sub>-rich” (CO<sub>2</sub>/(CO+CO<sub>2</sub>)=0.8) synthesis gas can be found in Table S1. Time on stream (ToS) ranges can be found in Table S2.

**Table S1** Feed compositions.

| CO <sub>2</sub> /(CO+CO <sub>2</sub> ) ratio | H <sub>2</sub> / vol% | CO/ vol% | CO <sub>2</sub> / vol% | N <sub>2</sub> / vol% | Ar/ vol% |
|----------------------------------------------|-----------------------|----------|------------------------|-----------------------|----------|
| 0.2                                          | 37.5                  | 12       | 3                      | 15                    | 32.5     |
| 0.8                                          | 46.5                  | 3        | 12                     | 15                    | 23.5     |

**Table S2** Time on stream (ToS) ranges in which the inlet feeds (Table S1) were measured.

| Catalyst                 | ToS range / h                              |                                            |
|--------------------------|--------------------------------------------|--------------------------------------------|
|                          | CO <sub>2</sub> /(CO+CO <sub>2</sub> )=0.2 | CO <sub>2</sub> /(CO+CO <sub>2</sub> )=0.8 |
| CZZ <sup>BP</sup> 40/FER | 37–39                                      | 41–43                                      |
| CZZ <sup>BP</sup> 60/FER | 37–39                                      | 41–43                                      |
| CZZ <sup>CP</sup> 40/FER | 35–37                                      | 39–41                                      |
| CZZ <sup>CP</sup> 60/FER | 37–39                                      | 41–43                                      |
| CZA <sup>com</sup> /FER  | 62–64                                      | 66–68                                      |

ToS ranges for CZA/FER are slightly higher because as our reference material it was investigated in more detail. The differences are rather small, so it is still suitable for comparison of the different materials.

## Equations

The conversion of CO and CO<sub>2</sub> is expressed in the CO<sub>x</sub> conversion  $X_{CO_x}$ :

$$X_{CO_x} = \frac{\dot{n}_{CO,in} - \dot{n}_{CO,out} + \dot{n}_{CO_2,in} - \dot{n}_{CO_2,out}}{\dot{n}_{CO,in} + \dot{n}_{CO_2,in}} \cdot 100 [\%] \quad (S1)$$

DME productivity  $P_{DME}$  is related to mass of the MeOH catalyst and defined as following:

$$P_{DME} = \frac{\dot{m}_{DME,out}}{m_{MeOH\ cat.}} \left[ \frac{g}{kg \cdot h} \right] \quad (S2)$$

Productivity of not converted MeOH is related to the mass of MeOH catalyst and defined as following:

$$P_{MeOH} = \frac{\dot{m}_{MeOH,out}}{m_{MeOH\ cat.}} \left[ \frac{g}{kg \cdot h} \right] \quad (S3)$$

The mass specific cumulative MeOH productivity  $P_{MeOH, cum.}$  is defined as following:

$$P_{MeOH, cum.} = \frac{2 \dot{n}_{DME,out} + \dot{n}_{MeOH,out}}{m_{MeOH\ cat.}} \left[ \frac{mol}{kg \cdot h} \right] \quad (S4)$$

## References

1. Thommes, M.; Kaneko, K.; Neimark, A.V.; Olivier, J.P.; Rodriguez-Reinoso, F.; Rouquerol, J.; Sing, K.S.W. Physisorption of gases, with special reference to the evaluation of surface area and pore size distribution (IUPAC Technical Report). *Pure Appl. Chem.* **2015**, *87*, 1051-1069, doi:10.1515/pac-2014-1117.
